# Supplementary material for: Melanoma-Derived Extracellular Vesicles Bear the Potential for the Induction of Antigen-Specific Tolerance
Source: PubMed Central journal article supplement (PMC6679195; doi:10.3390/cells8070665), 2019-07-02
Supplement: cells-08-00665-s001.pdf [file cells-08-00665-s001.pdf]

**Supplementary file**

Supplementary Table 1. Primers used for amplification of mRNAs (forward – F and reverse - R)

| Amplified gene      | NCBI Reference Sequence | Primer sequence                                                                               | Amplicon size (bp) |
|---------------------|-------------------------|-----------------------------------------------------------------------------------------------|--------------------|
| <i>CD86</i>         | NM_175862.4             | F: 5' – GAG GGG TTT TGG TGA TAC CC – 3'<br>R: 5' – TTA TCA AGG TGA TGG CTC TCC – 3'           | 83                 |
| <i>CD80</i>         | NM_005191.3             | F: 5' – AAC CAA CTA TCC TGT CTT TAA GTG C – 3'<br>R: 5' – GCA GCA TAT CAC AAA AAT TCC AT – 3' | 110                |
| <i>CD40</i>         | NM_001250.5             | F: 5' – ACC TCG CTA TGG TTC GTC TG – 3'<br>R: 5' – CAG TGG GTG GTT CTG GAT G – 3'             | 81                 |
| <i>HLA-A</i>        | NM_002116.7             | F: 5' – TTG AGA GCC TAC CTG GAT GG – 3'<br>R: 5' – TGG TGG GTC ATA TGT GTC TTG – 3'           | 110                |
| <i>HLA-B</i>        | NM_005514.7             | F: 5' – CCT ACC TGG AGG GCG AGT – 3'<br>R: 5' – GGT GGG TCA CGT GTG TCT TT – 3'               | 102                |
| <i>HLA-C</i>        | NM_002117.5             | F: 5' – ATA CCT GGA GAA CGG GAA GG – 3'<br>R: 5' – TGG CCT CAT GGT CAG AGA G – 3'             | 89                 |
| <i>HLA-DR alpha</i> | NM_019111.4             | F: 5' – CAA GGG ATT GCG CAA AAG – 3'<br>R: 5' – AAG CAG AAG TTT CTT CAG TGA TCT T – 3'        | 106                |
